# Supplementary material for: The relationship between artificial intelligence and civil servants’ work performance: a chain mediation model of self-efficacy and innovation ability
Source: Research Square preprint supplement (doi:10.21203/rs.3.rs-6526907/v1), 2025-07-28
Supplement: Supplementary file 1 [file f710a0aa87273a7c0a8f3aac.xlsx]

## Sheet: Sheet1
省份	城市	性别	年龄	受教育年限	政治面貌	职级	收入（月）	工作时长（年）	AIP1	AIP2	AIP3	AIP4	AIP5	AIP6	WE4	WE5	WE1	WE2	WE3	IR1	IR2	IR3	IR4	IA1	IA2	IA3	IA4	WP1	WP2	WP3	WP4	WP5	LAT1_AIP	LAT2_WE	LAT3_IR	LAT4_IA	LAT5_WP	_est_MR	_est_M1_1	_est_M1_2	_est_M2_1	_est_M2_2	_est_MM_1	_est_MM_2	X_IR	M1_IR	M2_IR	X_centered	IR_centered
河南省	信阳市	1	26	16	1	1	4500	2	4	5	4	4	4	5	4	4	5	4	4	4	4	5	5	5	4	4	4	4	4	4	4	3	4.33333	4.33333	4.5	4.25	3.8	1	1	1	1	1	1	1	0.197122	19.5	19.125	0.341216	0.577703
山东省	青岛市	1	32	16	1	2	8000	5	5	5	5	5	3	5	4	4	4	4	4	3	3	3	3	5	3	4	3	5	5	5	5	5	4.66667	4	3	3.75	5	1	1	1	1	1	1	1	-0.622135	12	11.25	0.674549	-0.922297
山东省	青岛市	0	31	16	1	2	9500	5	4	5	5	4	5	4	4	5	5	4	5	4	5	4	5	5	4	5	4	5	5	5	5	4	4.5	4.66667	4.5	4.5	4.8	1	1	1	1	1	1	1	0.293405	21	20.25	0.507883	0.577703
山东省	东营市	1	34	16	1	1	6000	6	5	4	4	4	5	4	4	5	5	5	4	4	4	5	4	5	5	5	5	4	5	4	5	4	4.33333	4.66667	4.25	5	4.4	1	1	1	1	1	1	1	0.111818	19.8333	21.25	0.341216	0.327703
山东省	菏泽市	1	31	16	1	1	6000	6	4	4	4	5	4	5	5	5	4	5	5	4	5	4	4	4	5	5	5	5	4	5	5	4	4.33333	4.66667	4.25	4.75	4.6	1	1	1	1	1	1	1	0.111818	19.8333	20.1875	0.341216	0.327703
山东省	菏泽市	1	32	16	1	1	6000	6	5	5	4	5	5	5	5	5	5	5	4	4	5	4	5	5	5	4	5	4	4	4	5	5	4.83333	4.66667	4.5	4.75	4.4	1	1	1	1	1	1	1	0.485973	21	21.375	0.841216	0.577703
山东省	日照市	1	32	16	1	1	6000	6	5	5	5	5	4	5	5	4	5	5	5	5	4	4	5	4	5	5	4	4	5	4	4	5	4.83333	5	4.5	4.5	4.4	1	1	1	1	1	1	1	0.485973	22.5	20.25	0.841216	0.577703
河南省	驻马店市	1	56	16	1	2	8000	34	4	4	4	4	3	4	5	4	4	5	4	4	4	4	4	4	4	4	4	5	3	4	4	4	3.83333	4.33333	4	4	4	1	1	1	1	1	1	1	-0.0123379	17.3333	16	-0.158784	0.0777027
河南省	南阳市	1	33	19	1	1	5280	7	4	5	3	2	2	2	4	5	4	5	4	3	4	2	1	4	3	4	4	5	4	4	5	5	3	4.33333	2.5	3.75	4.6	1	1	1	1	1	1	1	1.41108	10.8333	9.375	-0.992117	-1.4223
山东省	威海市	1	31	16	1	1	6000	7	5	5	5	4	5	4	4	4	5	4	5	4	4	4	4	5	5	5	4	5	4	5	5	4	4.66667	4.66667	4	4.75	4.6	1	1	1	1	1	1	1	0.0524143	18.6667	19	0.674549	0.0777027
辽宁省	沈阳市	0	40	16	1	1	4500	18	4	5	4	3	3	4	5	4	5	4	4	4	5	4	4	4	4	4	4	5	4	5	4	4	3.83333	4.33333	4.25	4	4.4	1	1	1	1	1	1	1	-0.0520339	18.4167	17	-0.158784	0.327703
山东省	烟台市	1	32	16	1	1	6000	7	5	5	4	5	5	4	5	4	4	5	4	4	5	5	4	4	4	5	5	4	4	5	5	5	4.66667	4.33333	4.5	4.5	4.6	1	1	1	1	1	1	1	0.389689	19.5	20.25	0.674549	0.577703
山东省	威海市	1	32	16	1	1	6000	6	5	4	4	5	5	5	5	4	4	5	5	4	5	5	4	5	5	5	4	5	5	4	5	4	4.66667	4.66667	4.5	4.75	4.6	1	1	1	1	1	1	1	0.389689	21	21.375	0.674549	0.577703
山东省	烟台市	1	34	16	1	1	6000	7	5	5	4	5	5	5	4	5	5	4	4	4	5	4	4	5	5	5	4	5	5	4	5	4	4.83333	4.33333	4.25	4.75	4.6	1	1	1	1	1	1	1	0.275669	18.4167	20.1875	0.841216	0.327703
山东省	潍坊市	1	31	16	1	1	6000	6	4	5	4	5	4	4	4	5	5	4	5	4	4	5	5	5	5	5	5	4	5	5	5	5	4.33333	4.66667	4.5	5	4.8	1	1	1	1	1	1	1	0.197122	21	22.5	0.341216	0.577703
广东省	广州市	0	28	12	1	2	8000	6	4	4	4	4	4	4	5	4	5	4	4	5	5	4	4	4	5	5	4	4	4	4	4	5	4	4.33333	4.5	4.5	4.2	1	1	1	1	1	1	1	0.004554	19.5	20.25	0.0078829	0.577703
山东省	泰安市	1	32	16	1	1	6000	7	5	4	5	4	4	5	5	5	5	4	5	5	5	4	4	4	5	5	5	5	4	5	4	5	4.5	4.66667	4.5	4.75	4.6	1	1	1	1	1	1	1	0.293405	21	21.375	0.507883	0.577703
山东省	日照市	1	32	16	1	1	6000	6	4	4	4	5	5	4	5	5	5	5	4	5	4	4	4	5	4	5	5	5	4	5	5	5	4.33333	4.66667	4.25	4.75	4.8	1	1	1	1	1	1	1	0.111818	19.8333	20.1875	0.341216	0.327703
山东省	济宁市	1	32	16	1	1	6000	7	4	4	5	5	5	4	4	5	4	5	4	4	4	4	5	4	5	5	5	4	4	5	5	4	4.5	4.33333	4.25	4.75	4.4	1	1	1	1	1	1	1	0.166435	18.4167	20.1875	0.507883	0.327703
山东省	菏泽市	1	32	16	1	1	6000	7	5	4	4	5	5	4	4	5	4	4	5	5	4	5	4	4	5	5	5	5	5	4	5	5	4.5	4.33333	4.5	4.75	4.8	1	1	1	1	1	1	1	0.293405	19.5	21.375	0.507883	0.577703
山东省	东营市	1	34	16	1	1	6000	6	4	4	4	4	4	5	4	4	5	5	4	4	4	5	5	4	5	5	5	5	4	5	4	5	4.16667	4.66667	4.5	4.75	4.6	1	1	1	1	1	1	1	0.100838	21	21.375	0.174549	0.577703
河南省	郑州市	1	25	17	1	1	4000	3	3	4	4	5	2	3	4	4	4	4	3	3	3	3	3	4	3	3	4	4	4	3	5	3	3.5	3.66667	3	3.5	3.8	1	1	1	1	1	1	1	0.453878	11	10.5	-0.492117	-0.922297
江苏省	苏州市	0	34	19	1	2	8200	9	4	5	4	4	4	5	5	4	5	4	4	4	5	5	5	4	5	5	5	4	4	4	5	5	4.33333	4.33333	4.75	4.75	4.4	1	1	1	1	1	1	1	0.282426	20.5833	22.5625	0.341216	0.827703
山东省	东营市	0	29	16	1	1	5000	6	5	5	4	5	5	4	5	4	5	4	4	5	4	4	5	4	5	5	5	4	4	4	5	5	4.66667	4.33333	4.5	4.75	4.4	1	1	1	1	1	1	1	0.389689	19.5	21.375	0.674549	0.577703
山东省	济南市	1	31	16	1	1	6000	7	4	5	5	4	4	4	5	4	4	5	5	4	5	5	4	4	5	5	5	4	4	5	5	4	4.33333	4.66667	4.5	4.75	4.4	1	1	1	1	1	1	1	0.197122	21	21.375	0.341216	0.577703
山东省	滨州市	1	31	16	1	1	6000	7	4	5	5	5	4	5	5	5	5	5	4	4	5	4	4	4	5	5	5	4	4	5	4	4	4.66667	4.66667	4.25	4.75	4.2	1	1	1	1	1	1	1	0.221052	19.8333	20.1875	0.674549	0.327703
山东省	滨州市	1	31	16	1	1	5000	6	5	5	4	4	4	5	4	4	5	5	5	5	4	4	5	5	4	5	5	5	4	5	4	5	4.5	5	4.5	4.75	4.6	1	1	1	1	1	1	1	0.293405	22.5	21.375	0.507883	0.577703
四川省	成都市	1	47	14	1	3	9000	24	4	4	4	4	3	4	4	4	5	4	5	4	4	4	4	4	4	4	4	3	3	4	4	4	3.83333	4.66667	4	4	3.6	1	1	1	1	1	1	1	-0.0123379	18.6667	16	-0.158784	0.0777027
河南省	郑州市	1	35	16	1	2	6000	11	3	4	4	4	3	4	4	3	5	4	4	3	4	3	3	4	3	3	3	4	3	4	3	4	3.66667	4.33333	3.25	3.25	3.6	1	1	1	1	1	1	1	0.218799	14.0833	10.5625	-0.32545	-0.672297
湖北省	襄阳市	1	36	18	0	1	8500	10	4	4	4	4	4	4	4	5	5	4	5	4	4	5	5	2	3	3	3	3	3	2	2	4	4	4.66667	4.5	2.75	2.8	1	1	1	1	1	1	1	0.004554	21	12.375	0.0078829	0.577703
安徽省	亳州市	1	25	16	0	1	4000	2	4	5	5	5	2	4	4	4	5	4	4	3	3	3	4	4	4	3	3	4	5	4	4	4	4.16667	4.33333	3.25	3.5	4.2	1	1	1	1	1	1	1	-0.117349	14.0833	11.375	0.174549	-0.672297
山东省	滨州市	1	31	16	1	1	6000	7	5	4	5	4	5	4	5	5	5	4	5	4	5	4	5	5	4	5	4	5	4	5	5	4	4.5	4.66667	4.5	4.5	4.6	1	1	1	1	1	1	1	0.293405	21	20.25	0.507883	0.577703
江苏省	盐城市	0	35	19	1	2	8500	9	4	4	5	3	4	5	5	4	5	5	4	5	4	5	5	4	5	5	5	4	4	5	4	5	4.16667	4.66667	4.75	4.75	4.4	1	1	1	1	1	1	1	0.144475	22.1667	22.5625	0.174549	0.827703
江苏省	盐城市	1	34	16	1	2	9100	11	4	5	4	3	3	5	4	4	5	5	4	4	5	4	4	5	4	4	4	5	5	4	5	4	4	4.66667	4.25	4.25	4.6	1	1	1	1	1	1	1	0.0025832	19.8333	18.0625	0.0078829	0.327703
广西壮族自治区	南宁市	0	22	16	1	2	4000	2	5	5	5	4	5	5	4	5	5	5	5	5	5	5	5	5	5	4	4	4	4	4	5	4	4.83333	5	5	4.5	4.2	1	1	1	1	1	1	1	0.906581	25	22.5	0.841216	1.0777
广西壮族自治区	南宁市	0	25	16	0	1	4000	3	4	5	4	3	4	5	4	4	5	4	5	4	4	5	5	4	4	4	4	3	4	4	4	4	4.16667	4.66667	4.5	4	3.8	1	1	1	1	1	1	1	0.100838	21	18	0.174549	0.577703
山西省	阳泉市	0	22	16	0	2	3000	1	3	4	4	4	3	5	4	4	4	4	4	4	5	4	4	4	4	4	4	4	5	3	2	4	3.83333	4	4.25	4	3.6	1	1	1	1	1	1	1	-0.0520339	17	17	-0.158784	0.327703
广东省	汕尾市	0	32	16	1	2	8600	6	4	4	3	4	2	5	4	4	4	4	4	2	4	2	2	4	3	4	3	4	4	4	4	4	3.66667	4	2.5	3.5	4	1	1	1	1	1	1	1	0.462887	10	8.75	-0.32545	-1.4223
山东省	济南市	0	27	18	1	1	5400	2	5	5	4	4	4	4	3	3	3	3	3	3	4	3	2	3	3	3	2	4	3	4	4	4	4.33333	3	3	2.75	3.8	1	1	1	1	1	1	1	-0.314703	9	8.25	0.341216	-0.922297
甘肃省	兰州市	0	33	16	1	2	6000	11	3	4	4	4	4	4	4	4	4	4	4	4	4	3	3	4	3	3	3	4	3	3	3	3	3.83333	4	3.5	3.25	3.2	1	1	1	1	1	1	1	0.067054	14	11.375	-0.158784	-0.422297
山西省	晋中市	1	27	16	1	1	4500	4	4	5	5	4	3	5	5	4	5	4	4	4	4	3	2	4	3	4	3	4	4	4	2	4	4.33333	4.33333	3.25	3.5	3.6	1	1	1	1	1	1	1	-0.229399	14.0833	11.375	0.341216	-0.672297
山东省	青岛市	1	33	16	1	1	5500	6	4	4	5	4	4	5	5	4	4	5	4	5	5	4	5	5	4	4	4	5	5	5	4	5	4.33333	4.33333	4.75	4.25	4.8	1	1	1	1	1	1	1	0.282426	20.5833	20.1875	0.341216	0.827703
西藏自治区	林芝市	0	27	16	1	2	11405	2	3	4	4	5	2	3	4	3	4	4	4	3	4	3	3	3	3	4	3	3	4	3	3	3	3.5	4	3.25	3.25	3.2	1	1	1	1	1	1	1	0.330849	13	10.5625	-0.492117	-0.672297
广东省	广州市	1	35	16	0	2	6999	8	3	2	4	4	2	4	5	3	5	4	4	4	5	4	3	3	3	4	3	4	3	5	4	4	3.16667	4.33333	4	3.25	4	1	1	1	1	1	1	1	-0.0641397	17.3333	13	-0.82545	0.0777027
云南省	昆明市	0	28	16	1	1	5000	5	3	4	2	5	3	4	4	3	5	4	4	3	2	4	3	4	2	3	4	4	4	3	2	3	3.5	4.33333	3	3.25	3.2	1	1	1	1	1	1	1	0.453878	13	9.75	-0.492117	-0.922297
浙江省	台州市	0	26	16	0	2	8900	2	3	4	4	3	2	3	3	3	3	2	3	3	2	3	2	2	3	2	2	3	3	3	3	3	3.16667	2.66667	2.5	2.25	3	1	1	1	1	1	1	1	1.17404	6.66667	5.625	-0.82545	-1.4223
江苏省	常州市	1	23	16	1	1	10500	2	4	5	3	5	3	4	4	4	5	4	5	4	5	3	3	4	3	3	4	5	5	5	4	5	4	4.66667	3.75	3.5	4.8	1	1	1	1	1	1	1	-0.0013582	17.5	13.125	0.0078829	-0.172297
江苏省	南京市	1	35	16	1	2	15000	9	3	4	4	4	4	4	4	2	4	4	4	4	4	4	4	2	3	3	3	4	4	3	4	4	3.83333	4	4	2.75	3.8	1	1	1	1	1	1	1	-0.0123379	16	11	-0.158784	0.0777027
湖南省	长沙市	0	23	15	0	1	3000	3	4	4	5	4	3	5	4	4	5	4	4	3	3	5	4	4	3	2	2	4	4	4	4	4	4.16667	4.33333	3.75	2.75	4	1	1	1	1	1	1	1	-0.0300744	16.25	10.3125	0.174549	-0.172297
四川省	成都市	0	42	19	1	3	20000	16	3	4	4	4	3	4	4	3	4	4	4	4	4	4	4	3	3	3	4	3	3	3	3	3	3.66667	4	4	3.25	3	1	1	1	1	1	1	1	-0.0252884	16	13	-0.32545	0.0777027
山东省	滨州市	1	35	16	1	2	8500	12	4	4	4	5	4	5	5	4	5	4	5	5	4	4	5	5	4	5	4	5	4	4	5	4	4.33333	4.66667	4.5	4.5	4.4	1	1	1	1	1	1	1	0.197122	21	20.25	0.341216	0.577703
重庆市	市辖区	0	25	16	0	2	6000	1	4	5	4	3	2	4	4	3	4	4	3	3	3	4	4	2	2	2	1	4	3	3	2	3	3.66667	3.66667	3.5	1.75	3	1	1	1	1	1	1	1	0.137437	12.8333	6.125	-0.32545	-0.422297
浙江省	杭州市	1	27	19	1	2	10144	2	4	5	3	4	3	4	5	5	4	5	4	4	4	4	5	4	4	4	4	4	4	5	5	5	3.83333	4.33333	4.25	4	4.6	1	1	1	1	1	1	1	-0.0520339	18.4167	17	-0.158784	0.327703
山西省	忻州市	0	32	16	0	2	4000	5	4	4	5	3	3	4	4	4	4	4	4	3	4	4	4	3	3	3	2	4	4	4	4	4	3.83333	4	3.75	2.75	4	1	1	1	1	1	1	1	0.027358	15	10.3125	-0.158784	-0.172297
四川省	成都市	0	39	16	1	2	10000	16	3	4	3	3	2	3	3	3	4	4	3	3	4	4	3	2	3	3	3	3	3	3	4	4	3	3.66667	3.5	2.75	3.4	1	1	1	1	1	1	1	0.418968	12.8333	9.625	-0.992117	-0.422297
河南省	商丘市	0	36	16	1	2	4000	8	4	4	4	4	3	4	4	3	5	4	4	4	4	4	4	3	3	3	3	4	4	3	4	4	3.83333	4.33333	4	3	3.8	1	1	1	1	1	1	1	-0.0123379	17.3333	12	-0.158784	0.0777027
山东省	威海市	0	30	16	1	1	4000	1	4	5	5	4	1	5	5	5	5	5	4	4	5	5	5	5	4	5	5	5	5	5	4	3	4	4.66667	4.75	4.75	4.4	1	1	1	1	1	1	1	0.0065247	22.1667	22.5625	0.0078829	0.827703
河北省	沧州市	0	42	16	0	1	4000	13	5	5	5	4	4	4	4	4	4	4	4	4	4	4	4	4	4	4	4	5	5	5	5	5	4.5	4	4	4	5	1	1	1	1	1	1	1	0.0394639	16	16	0.507883	0.0777027
江苏省	徐州市	1	26	16	0	1	8000	3	4	4	3	4	2	2	4	4	3	4	4	4	4	4	4	4	4	4	4	4	4	4	4	4	3.16667	3.66667	4	4	4	1	1	1	1	1	1	1	-0.0641397	14.6667	16	-0.82545	0.0777027
江西省	赣州市	0	25	17	0	2	9200	2	4	5	5	4	5	5	5	4	5	5	4	5	4	5	4	4	5	4	5	4	5	5	4	5	4.66667	4.66667	4.5	4.5	4.6	1	1	1	1	1	1	1	0.389689	21	20.25	0.674549	0.577703
广东省	广州市	0	27	19	1	2	11000	1	3	4	4	5	4	5	3	2	3	3	3	2	3	3	3	4	3	2	2	4	4	3	4	3	4.16667	3	2.75	2.75	3.6	1	1	1	1	1	1	1	-0.204624	8.25	7.5625	0.174549	-1.1723
四川省	达州市	0	26	17	1	1	4000	3	3	4	4	3	3	5	4	4	4	4	3	4	3	4	4	4	4	3	4	4	3	3	2	4	3.66667	3.66667	3.75	3.75	3.2	1	1	1	1	1	1	1	0.0560742	13.75	14.0625	-0.32545	-0.172297
宁夏回族自治区	银川市	0	26	16	1	1	3200	2	4	5	4	4	4	3	4	5	3	4	5	5	4	5	4	4	3	4	5	4	4	4	4	5	4	4	4.5	4	4.2	1	1	1	1	1	1	1	0.004554	18	18	0.0078829	0.577703
贵州省	遵义市	0	28	15	1	2	8500	8	3	4	5	4	4	5	4	4	4	5	5	4	5	4	4	4	4	4	5	4	5	4	4	4	4.16667	4.66667	4.25	4.25	4.2	1	1	1	1	1	1	1	0.0572003	19.8333	18.0625	0.174549	0.327703
辽宁省	大连市	0	25	16	0	2	6500	2	3	5	4	3	3	5	4	4	4	4	4	3	5	4	3	4	4	3	4	4	4	4	3	4	3.83333	4	3.75	3.75	3.8	1	1	1	1	1	1	1	0.027358	15	14.0625	-0.158784	-0.172297
广东省	珠海市	0	35	16	1	2	12600	14	5	4	5	4	5	4	5	4	5	5	4	5	4	4	5	4	4	5	4	4	5	4	4	5	4.5	4.66667	4.5	4.25	4.4	1	1	1	1	1	1	1	0.293405	21	19.125	0.507883	0.577703
天津市	市辖区	0	25	19	1	2	7300	1	3	4	3	3	2	3	4	4	4	4	4	4	4	4	4	4	4	4	4	3	4	4	3	4	3	4	4	4	3.6	1	1	1	1	1	1	1	-0.0770902	16	16	-0.992117	0.0777027
宁夏回族自治区	银川市	1	25	16	1	1	3200	2	5	4	4	4	5	4	4	5	5	4	5	4	5	4	5	5	4	4	3	4	4	4	3	4	4.33333	4.66667	4.5	4	3.8	1	1	1	1	1	1	1	0.197122	21	18	0.341216	0.577703
浙江省	绍兴市	0	28	19	1	1	9000	3	2	4	3	3	3	4	2	2	3	4	3	2	4	2	2	4	2	2	2	3	2	2	2	3	3.16667	3.33333	2.5	2.5	2.4	1	1	1	1	1	1	1	1.17404	8.33333	6.25	-0.82545	-1.4223
江苏省	南通市	1	27	16	1	2	5500	6	4	4	5	4	3	4	5	4	5	5	4	4	5	4	4	4	5	4	4	5	4	3	4	5	4	4.66667	4.25	4.25	4.2	1	1	1	1	1	1	1	0.0025832	19.8333	18.0625	0.0078829	0.327703
广东省	广州市	0	42	12	1	2	9000	12	4	5	4	4	3	4	5	4	4	5	4	4	5	5	4	4	4	4	5	4	5	4	4	4	4	4.33333	4.5	4.25	4.2	1	1	1	1	1	1	1	0.004554	19.5	19.125	0.0078829	0.577703
河北省	邢台市	1	44	16	1	2	8000	23	4	5	5	5	4	5	5	5	5	5	5	5	5	4	5	4	5	5	5	5	5	5	5	5	4.66667	5	4.75	4.75	5	1	1	1	1	1	1	1	0.558326	23.75	22.5625	0.674549	0.827703
江西省	抚州市	1	25	16	1	1	5600	3	4	5	4	5	4	5	5	4	5	4	4	4	4	5	5	4	4	5	4	5	4	5	4	5	4.5	4.33333	4.5	4.25	4.6	1	1	1	1	1	1	1	0.293405	19.5	19.125	0.507883	0.577703
云南省	红河哈尼族彝族自治州	0	27	19	1	2	4000	1.5	4	5	4	4	4	5	4	5	4	5	4	4	5	4	4	4	4	5	4	4	4	5	4	5	4.33333	4.33333	4.25	4.25	4.4	1	1	1	1	1	1	1	0.111818	18.4167	18.0625	0.341216	0.327703
四川省	成都市	1	32	19	0	2	7300	5	3	5	3	3	2	5	4	3	3	4	5	3	2	4	2	4	4	5	3	4	4	4	5	2	3.5	4	2.75	4	3.8	1	1	1	1	1	1	1	0.576908	11	11	-0.492117	-1.1723
山西省	阳泉市	1	33	12	0	1	6000	8	4	5	4	5	5	5	5	4	4	5	5	4	5	5	4	4	5	4	5	4	5	5	4	5	4.66667	4.66667	4.5	4.5	4.6	1	1	1	1	1	1	1	0.389689	21	20.25	0.674549	0.577703
四川省	绵阳市	0	25	19	1	2	9000	3	4	5	4	4	4	4	4	4	5	4	4	3	4	4	4	4	2	2	2	4	4	4	4	4	4.16667	4.33333	3.75	2.5	4	1	1	1	1	1	1	1	-0.0300744	16.25	9.375	0.174549	-0.172297
江苏省	镇江市	0	28	19	1	2	8500	3	4	4	3	4	3	5	3	2	3	2	3	2	2	3	2	4	2	3	3	5	4	4	4	2	3.83333	2.66667	2.25	3	3.8	1	1	1	1	1	1	1	0.265534	6	6.75	-0.158784	-1.6723
江苏省	南通市	0	33	16	0	1	9000	10	4	4	4	3	2	2	3	4	4	4	4	3	4	4	3	2	2	2	2	4	4	4	4	3	3.16667	4	3.5	2	3.8	1	1	1	1	1	1	1	0.348585	14	7	-0.82545	-0.422297
云南省	玉溪市	0	25	16	1	1	7000	2	3	5	4	4	2	4	3	3	5	4	4	5	5	4	3	4	3	2	2	3	4	3	4	4	3.66667	4.33333	4.25	2.75	3.6	1	1	1	1	1	1	1	-0.106651	18.4167	11.6875	-0.32545	0.327703
上海市	市辖区	0	29	19	0	2	10000	6	5	4	2	3	2	5	4	4	4	5	3	1	4	3	2	5	4	4	5	4	5	4	3	4	3.5	4	2.5	4.5	4	1	1	1	1	1	1	1	0.699937	10	11.25	-0.492117	-1.4223
安徽省	合肥市	1	35	18	1	2	11000	11	3	3	3	2	1	3	4	4	5	5	4	3	2	2	3	4	1	2	2	4	4	4	4	3	2.5	4.66667	2.5	2.25	3.8	1	1	1	1	1	1	1	2.12223	11.6667	5.625	-1.49212	-1.4223
海南省	海口市	0	25	16	1	1	4500	4	4	4	4	3	1	4	4	5	4	5	4	5	4	3	3	3	4	4	4	5	4	3	4	4	3.33333	4.33333	3.75	3.75	4	1	1	1	1	1	1	1	0.113507	16.25	14.0625	-0.658784	-0.172297
浙江省	宁波市	0	30	19	1	2	10000	8	3	4	4	5	3	4	4	5	4	5	4	5	5	4	5	4	4	5	4	4	5	5	4	5	3.83333	4.33333	4.75	4.25	4.6	1	1	1	1	1	1	1	-0.131426	20.5833	20.1875	-0.158784	0.827703
江苏省	南京市	1	25	16	0	1	15000	2	3	4	5	4	3	5	4	3	4	4	4	3	4	3	4	4	4	4	3	4	5	4	3	4	4	4	3.5	3.75	4	1	1	1	1	1	1	1	-0.0033289	14	13.125	0.0078829	-0.422297
广东省	揭阳市	1	34	15	1	1	4500	13	4	5	4	3	3	4	4	3	4	5	5	4	5	4	3	3	3	3	3	4	5	4	4	5	3.83333	4.66667	4	3	4.4	1	1	1	1	1	1	1	-0.0123379	18.6667	12	-0.158784	0.0777027
山西省	阳泉市	1	45	12	1	2	5000	25	5	4	3	3	4	3	4	4	4	4	4	4	4	4	4	4	3	3	3	4	4	4	4	4	3.66667	4	4	3.25	4	1	1	1	1	1	1	1	-0.0252884	16	13	-0.32545	0.0777027
河北省	沧州市	1	38	17	1	2	5000	14	3	4	3	2	2	4	2	3	4	4	3	4	5	4	2	4	2	1	2	4	4	3	4	3	3	3.66667	3.75	2.25	3.6	1	1	1	1	1	1	1	0.170939	13.75	8.4375	-0.992117	-0.172297
广东省	茂名市	1	35	16	1	2	4500	9	4	5	4	5	5	4	5	4	5	5	4	5	4	4	5	4	4	5	4	5	5	4	4	5	4.5	4.66667	4.5	4.25	4.6	1	1	1	1	1	1	1	0.293405	21	19.125	0.507883	0.577703
北京市	市辖区	0	26	19	1	1	8000	1	4	4	4	4	3	4	4	3	4	4	4	3	4	3	4	4	4	4	3	4	4	4	3	3	3.83333	4	3.5	3.75	3.6	1	1	1	1	1	1	1	0.067054	14	13.125	-0.158784	-0.422297
河南省	焦作市	0	24	16	0	1	6700	1	4	5	4	3	4	4	5	4	4	4	4	4	5	4	4	4	4	3	4	4	4	4	4	4	4	4	4.25	3.75	4	1	1	1	1	1	1	1	0.0025832	17	15.9375	0.0078829	0.327703
云南省	昆明市	1	29	18	1	2	7000	1	5	5	4	5	2	3	5	4	5	5	4	4	5	3	3	3	2	3	3	4	4	5	4	4	4	4.66667	3.75	2.75	4.2	1	1	1	1	1	1	1	-0.0013582	17.5	10.3125	0.0078829	-0.172297
山东省	青岛市	0	39	16	1	2	5000	10	4	4	5	5	3	4	5	4	5	5	5	3	2	1	3	5	5	5	5	5	5	5	5	5	4.16667	5	2.25	5	5	1	1	1	1	1	1	1	-0.291899	11.25	11.25	0.174549	-1.6723
山东省	济南市	0	34	19	1	2	8500	8	4	5	4	4	4	4	4	5	5	4	4	4	5	4	4	4	5	4	4	5	4	4	4	5	4.16667	4.33333	4.25	4.25	4.4	1	1	1	1	1	1	1	0.0572003	18.4167	18.0625	0.174549	0.327703
广东省	梅州市	0	29	16	0	1	6500	4	5	5	5	4	3	5	5	4	5	4	5	4	5	4	4	2	4	3	4	4	4	4	5	4	4.5	4.66667	4.25	3.25	4.2	1	1	1	1	1	1	1	0.166435	19.8333	13.8125	0.507883	0.327703
江苏省	苏州市	1	35	16	0	1	14000	3	4	4	4	4	5	4	4	4	4	4	4	4	4	4	4	3	3	3	3	3	3	3	3	3	4.16667	4	4	3	3	1	1	1	1	1	1	1	0.013563	16	12	0.174549	0.0777027
河南省	洛阳市	0	26	19	1	2	8000	3	4	5	4	3	3	4	4	4	5	5	3	3	4	4	4	4	4	4	4	5	4	4	3	3	3.83333	4.33333	3.75	4	3.8	1	1	1	1	1	1	1	0.027358	16.25	15	-0.158784	-0.172297
湖南省	长沙市	1	25	19	1	1	2562	1	4	5	4	4	2	4	4	3	4	4	4	3	4	3	3	3	4	4	3	4	4	4	4	4	3.83333	4	3.25	3.5	4	1	1	1	1	1	1	1	0.10675	13	11.375	-0.158784	-0.672297
河北省	石家庄市	0	28	18	1	2	4000	3	5	5	4	3	2	5	5	4	3	2	2	2	4	2	1	2	3	4	4	2	3	4	4	5	4	2.33333	2.25	3.25	3.6	1	1	1	1	1	1	1	-0.0131825	5.25	7.3125	0.0078829	-1.6723
江西省	南昌市	0	26	16	0	1	4500	1	3	4	5	4	3	4	4	4	5	4	4	4	4	4	4	3	3	3	2	4	4	4	3	4	3.83333	4.33333	4	2.75	3.8	1	1	1	1	1	1	1	-0.0123379	17.3333	11	-0.158784	0.0777027
广东省	广州市	0	25	16	1	2	5700	3	3	4	3	4	4	3	5	4	4	5	3	3	5	4	3	3	5	3	4	4	3	3	3	4	3.5	4	3.75	3.75	3.4	1	1	1	1	1	1	1	0.0847904	15	14.0625	-0.492117	-0.172297
江西省	抚州市	0	25	16	1	2	5000	1	4	4	4	4	3	4	4	4	5	5	4	4	4	5	5	5	4	4	4	4	4	4	4	4	3.83333	4.66667	4.5	4.25	4	1	1	1	1	1	1	1	-0.0917299	21	19.125	-0.158784	0.577703
北京市	市辖区	0	26	17	0	1	9000	2	4	5	3	4	4	5	4	4	5	5	4	4	3	3	4	4	3	4	4	4	4	4	4	4	4.16667	4.66667	3.5	3.75	4	1	1	1	1	1	1	1	-0.0737117	16.3333	13.125	0.174549	-0.422297
重庆市	市辖区	0	25	16	0	1	1800	1	4	4	5	4	2	3	5	5	5	5	4	3	4	5	4	3	3	3	3	5	5	5	5	5	3.66667	4.66667	4	3	5	1	1	1	1	1	1	1	-0.0252884	18.6667	12	-0.32545	0.0777027
甘肃省	兰州市	1	25	16	1	2	8900	3	4	5	5	5	5	5	5	4	5	4	5	3	4	4	4	3	2	2	2	4	5	5	4	4	4.83333	4.66667	3.75	2.25	4.4	1	1	1	1	1	1	1	-0.144939	17.5	8.4375	0.841216	-0.172297
河南省	郑州市	1	29	19	0	2	7000	3	4	5	3	4	4	5	5	2	5	5	4	4	5	3	4	4	4	5	5	4	4	2	4	3	4.16667	4.66667	4	4.5	3.4	1	1	1	1	1	1	1	0.013563	18.6667	18	0.174549	0.0777027
浙江省	嘉兴市	0	27	19	1	2	8000	3	4	5	5	4	2	3	3	2	4	4	4	2	2	5	4	3	1	2	1	4	3	4	4	3	3.83333	4	3.25	1.75	3.6	1	1	1	1	1	1	1	0.10675	13	5.6875	-0.158784	-0.672297
河北省	沧州市	0	47	15	0	1	6000	26	5	4	4	5	3	4	5	4	5	4	4	4	4	3	3	3	3	2	3	3	3	2	3	2	4.16667	4.33333	3.5	2.75	2.6	1	1	1	1	1	1	1	-0.0737117	15.1667	9.625	0.174549	-0.422297
广东省	广州市	0	28	19	0	2	15000	4	4	4	4	3	3	5	4	4	5	4	4	4	4	5	4	4	4	4	4	4	4	5	4	4	3.83333	4.33333	4.25	4	4.2	1	1	1	1	1	1	1	-0.0520339	18.4167	17	-0.158784	0.327703
河北省	邢台市	0	52	14	0	2	6100	26	3	4	4	4	4	5	4	4	4	4	4	4	4	4	5	4	5	4	4	4	4	4	4	4	4	4	4.25	4.25	4	1	1	1	1	1	1	1	0.0025832	17	18.0625	0.0078829	0.327703
安徽省	合肥市	1	24	16	1	2	8000	1	4	5	5	4	4	5	5	4	5	4	4	4	4	5	5	5	5	4	5	5	4	5	4	4	4.5	4.33333	4.5	4.75	4.4	1	1	1	1	1	1	1	0.293405	19.5	21.375	0.507883	0.577703
河南省	安阳市	1	30	16	1	1	8000	7	5	4	5	4	4	4	4	4	4	4	5	3	4	4	4	4	4	4	3	3	3	4	4	4	4.33333	4.33333	3.75	3.75	3.6	1	1	1	1	1	1	1	-0.0587907	16.25	14.0625	0.341216	-0.172297
广西壮族自治区	玉林市	0	33	16	1	2	4000	11	5	4	5	3	3	5	4	2	4	4	3	3	4	1	1	2	2	3	4	5	4	3	4	4	4.16667	3.66667	2.25	2.75	4	1	1	1	1	1	1	1	-0.291899	8.25	6.1875	0.174549	-1.6723
江苏省	苏州市	1	27	19	0	1	7000	2	3	3	4	3	3	4	4	4	4	4	4	5	5	4	4	4	4	4	4	3	4	4	4	4	3.33333	4	4.5	4	3.8	1	1	1	1	1	1	1	-0.380581	18	18	-0.658784	0.577703
陕西省	咸阳市	0	25	22	0	1	7000	1	3	5	4	4	4	4	4	5	5	4	5	4	4	3	3	4	3	3	3	4	4	4	4	3	4	4.66667	3.5	3.25	3.8	1	1	1	1	1	1	1	-0.0033289	16.3333	11.375	0.0078829	-0.422297
河北省	承德市	0	26	16	0	1	3450	1	3	4	3	3	3	4	3	3	3	3	3	3	3	4	3	3	3	3	4	3	3	3	3	3	3.33333	3	3.25	3.25	3	1	1	1	1	1	1	1	0.442899	9.75	10.5625	-0.658784	-0.672297
湖北省	鄂州市	1	29	16	1	2	8500	4	5	5	5	4	4	5	4	4	5	5	4	4	5	5	5	5	4	4	5	4	4	5	4	5	4.66667	4.66667	4.75	4.5	4.4	1	1	1	1	1	1	1	0.558326	22.1667	21.375	0.674549	0.827703
湖南省	岳阳市	0	33	16	1	2	6000	12	4	4	3	2	2	4	3	4	4	4	4	2	3	2	2	4	3	2	2	3	4	2	3	3	3.16667	4	2.25	2.75	3	1	1	1	1	1	1	1	1.3804	9	6.1875	-0.82545	-1.6723
浙江省	宁波市	1	25	16	1	2	4000	2	3	3	5	3	4	4	4	4	4	4	4	3	3	4	5	3	2	3	3	4	4	4	4	4	3.66667	4	3.75	2.75	4	1	1	1	1	1	1	1	0.0560742	15	10.3125	-0.32545	-0.172297
山东省	济南市	0	25	19	1	1	8500	2	3	4	3	5	3	4	5	4	4	4	5	4	4	3	2	5	4	4	4	4	4	3	4	3	3.66667	4.33333	3.25	4.25	3.6	1	1	1	1	1	1	1	0.218799	14.0833	13.8125	-0.32545	-0.672297
辽宁省	沈阳市	0	26	17	1	2	5000	0.5	4	5	4	4	3	4	5	5	5	4	4	3	5	3	3	5	4	5	4	5	5	4	3	4	4	4.33333	3.5	4.5	4.2	1	1	1	1	1	1	1	-0.0033289	15.1667	15.75	0.0078829	-0.422297
河南省	濮阳市	0	28	16	1	2	4500	4	4	4	4	5	3	4	3	3	3	3	3	3	3	4	4	3	3	3	2	4	4	3	4	3	4	3	3.5	2.75	3.6	1	1	1	1	1	1	1	-0.0033289	10.5	9.625	0.0078829	-0.422297
辽宁省	盘锦市	1	23	16	1	2	6000	2	4	3	3	3	2	3	5	5	5	4	4	4	3	3	3	4	4	3	3	3	3	3	2	3	3	4.33333	3.25	3.5	2.8	1	1	1	1	1	1	1	0.666998	14.0833	11.375	-0.992117	-0.672297
江苏省	南通市	0	26	16	1	2	7000	3	5	5	5	4	4	5	5	5	5	5	5	5	5	3	4	5	4	5	5	5	4	5	5	5	4.66667	5	4.25	4.75	4.8	1	1	1	1	1	1	1	0.221052	21.25	20.1875	0.674549	0.327703
广东省	惠州市	0	28	16	1	1	8500	6	4	5	5	4	4	4	5	5	5	5	4	4	5	5	5	4	5	5	5	4	5	4	4	5	4.33333	4.66667	4.75	4.75	4.4	1	1	1	1	1	1	1	0.282426	22.1667	22.5625	0.341216	0.827703
山东省	潍坊市	1	27	16	0	2	9000	2	4	4	2	5	2	4	4	2	5	4	4	2	4	2	2	4	2	4	5	4	5	4	5	4	3.5	4.33333	2.5	3.75	4.4	1	1	1	1	1	1	1	0.699937	10.8333	9.375	-0.492117	-1.4223
湖北省	孝感市	0	23	16	1	1	7000	1	3	4	3	5	3	4	5	4	4	4	5	3	4	3	4	2	2	1	2	4	5	5	4	4	3.66667	4.33333	3.5	1.75	4.4	1	1	1	1	1	1	1	0.137437	15.1667	6.125	-0.32545	-0.422297
湖北省	鄂州市	0	26	19	1	2	5000	3	4	4	4	3	5	4	4	5	5	4	4	5	4	4	3	5	4	4	5	4	4	5	4	5	4	4.33333	4	4.5	4.4	1	1	1	1	1	1	1	0.0006125	17.3333	18	0.0078829	0.0777027
浙江省	宁波市	0	23	16	1	2	8000	1	2	4	5	4	3	5	5	4	4	4	5	4	4	4	5	4	4	3	4	4	4	3	4	3	3.83333	4.33333	4.25	3.75	3.6	1	1	1	1	1	1	1	-0.0520339	18.4167	15.9375	-0.158784	0.327703
北京市	市辖区	1	28	21	1	2	12000	2	4	4	5	4	3	5	4	4	4	4	3	3	2	1	2	4	3	4	2	3	4	2	3	3	4.16667	3.66667	2	3.25	3	1	1	1	1	1	1	1	-0.335536	7.33333	6.5	0.174549	-1.9223
广西壮族自治区	钦州市	0	36	16	1	2	10000	14	5	4	5	4	5	4	4	5	4	5	4	4	4	5	4	4	5	4	4	5	4	4	5	5	4.5	4.33333	4.25	4.25	4.6	1	1	1	1	1	1	1	0.166435	18.4167	18.0625	0.507883	0.327703
北京市	市辖区	1	44	16	1	2	15000	20	5	4	4	5	4	4	5	4	5	4	4	5	4	4	5	4	5	4	4	5	4	5	5	4	4.33333	4.33333	4.5	4.25	4.6	1	1	1	1	1	1	1	0.197122	19.5	19.125	0.341216	0.577703
黑龙江省	大庆市	0	25	19	1	2	8000	5	4	5	4	5	4	5	4	5	4	5	4	5	5	4	4	5	5	4	4	5	4	4	4	5	4.5	4.33333	4.5	4.5	4.4	1	1	1	1	1	1	1	0.293405	19.5	20.25	0.507883	0.577703
甘肃省	兰州市	1	25	14	0	2	7500	2	4	5	5	4	4	5	5	4	4	5	4	4	5	4	5	4	5	5	4	5	4	4	5	4	4.5	4.33333	4.5	4.5	4.4	1	1	1	1	1	1	1	0.293405	19.5	20.25	0.507883	0.577703
湖南省	长沙市	0	26	16	1	1	3500	6	4	5	4	4	3	3	5	4	4	4	4	4	5	4	4	4	3	3	4	4	4	4	5	4	3.83333	4	4.25	3.5	4.2	1	1	1	1	1	1	1	-0.0520339	17	14.875	-0.158784	0.327703
湖南省	常德市	1	58	16	1	2	7200	30	4	4	4	3	2	3	4	4	5	4	4	3	4	4	3	4	3	4	3	3	4	3	4	3	3.33333	4.33333	3.5	3.5	3.4	1	1	1	1	1	1	1	0.278203	15.1667	12.25	-0.658784	-0.422297
内蒙古自治区	赤峰市	0	64	15	0	2	12000	40	5	3	3	5	3	3	4	3	4	4	4	3	4	5	4	5	4	4	3	4	5	4	4	5	3.66667	4	4	4	4.4	1	1	1	1	1	1	1	-0.0252884	16	16	-0.32545	0.0777027
河南省	平顶山市	0	26	16	1	2	11580	7	3	4	4	3	3	4	3	2	4	4	3	2	4	3	4	5	3	4	2	4	4	4	3	3	3.5	3.66667	3.25	3.5	3.6	1	1	1	1	1	1	1	0.330849	11.9167	11.375	-0.492117	-0.672297
浙江省	杭州市	1	23	19	1	2	6000	1	4	5	5	4	3	4	5	5	5	4	5	4	4	5	5	5	5	4	4	5	5	4	3	4	4.16667	4.66667	4.5	4.5	4.2	1	1	1	1	1	1	1	0.100838	21	20.25	0.174549	0.577703
广东省	深圳市	1	23	16	0	2	8000	6	5	4	5	4	5	4	4	5	4	5	4	4	5	4	5	4	5	4	5	4	5	5	4	5	4.5	4.33333	4.5	4.5	4.6	1	1	1	1	1	1	1	0.293405	19.5	20.25	0.507883	0.577703
山东省	青岛市	0	35	16	1	2	7000	12	4	4	5	4	4	5	5	5	5	4	5	5	5	4	5	5	4	4	5	4	5	5	4	5	4.33333	4.66667	4.75	4.5	4.6	1	1	1	1	1	1	1	0.282426	22.1667	21.375	0.341216	0.827703
黑龙江省	哈尔滨市	1	58	16	1	3	15000	35	4	4	4	3	4	5	5	4	5	4	4	4	5	4	4	3	4	4	4	4	4	4	4	4	4	4.33333	4.25	3.75	4	1	1	1	1	1	1	1	0.0025832	18.4167	15.9375	0.0078829	0.327703
四川省	成都市	1	35	16	1	2	8000	8	5	5	5	4	5	4	5	4	5	5	4	5	4	5	4	5	4	5	4	4	5	5	5	4	4.66667	4.66667	4.5	4.5	4.6	1	1	1	1	1	1	1	0.389689	21	20.25	0.674549	0.577703
江苏省	苏州市	0	31	16	1	2	7000	7	4	4	4	5	5	4	4	5	5	4	5	4	5	4	5	5	4	4	5	4	5	4	5	4	4.33333	4.66667	4.5	4.5	4.4	1	1	1	1	1	1	1	0.197122	21	20.25	0.341216	0.577703
江西省	九江市	0	37	16	1	2	5800	14	3	4	4	4	3	5	5	4	5	5	4	4	4	4	5	4	3	4	4	5	3	4	3	5	3.83333	4.66667	4.25	3.75	4	1	1	1	1	1	1	1	-0.0520339	19.8333	15.9375	-0.158784	0.327703
浙江省	台州市	0	22	16	0	1	6000	1	3	4	4	3	2	4	4	4	4	4	4	3	4	4	3	3	2	2	2	4	4	4	4	4	3.33333	4	3.5	2.25	4	1	1	1	1	1	1	1	0.278203	14	7.875	-0.658784	-0.422297
江苏省	苏州市	0	33	16	0	2	7000	9	4	4	5	4	1	4	4	2	4	4	3	2	1	1	1	4	4	4	3	4	5	4	4	5	3.66667	3.66667	1.25	3.75	4.4	1	1	1	1	1	1	1	0.8697	4.58333	4.6875	-0.32545	-2.6723
安徽省	合肥市	1	31	13	1	2	5500	5	4	5	4	3	1	5	4	4	5	5	4	4	4	5	4	4	4	3	4	5	4	4	4	4	3.66667	4.66667	4.25	3.75	4.2	1	1	1	1	1	1	1	-0.106651	19.8333	15.9375	-0.32545	0.327703
天津市	市辖区	1	46	19	1	2	9000	23	4	5	5	4	4	5	3	2	4	4	4	5	3	3	5	3	4	4	4	4	5	5	4	3	4.5	4	4	3.75	4.2	1	1	1	1	1	1	1	0.0394639	16	15	0.507883	0.0777027
河南省	郑州市	1	23	16	1	2	5000	2	4	5	4	2	2	3	4	4	4	3	3	3	4	5	5	4	3	3	3	4	5	4	4	3	3.33333	3.33333	4.25	3.25	4	1	1	1	1	1	1	1	-0.215885	14.1667	13.8125	-0.658784	0.327703
广西壮族自治区	柳州市	0	25	15	0	1	5000	2	3	4	3	4	3	4	4	5	4	5	4	3	3	4	5	5	4	3	4	5	4	3	2	4	3.5	4.33333	3.75	4	3.6	1	1	1	1	1	1	1	0.0847904	16.25	15	-0.492117	-0.172297
上海市	市辖区	1	26	18	1	2	7000	3	4	5	4	5	4	5	4	5	4	4	5	5	4	4	5	4	4	5	4	5	5	4	4	5	4.5	4.33333	4.5	4.25	4.6	1	1	1	1	1	1	1	0.293405	19.5	19.125	0.507883	0.577703
江西省	九江市	0	30	16	1	2	16000	6	4	5	5	4	4	4	4	4	3	4	4	4	4	4	4	4	4	4	4	4	4	5	4	4	4.33333	3.66667	4	4	4.2	1	1	1	1	1	1	1	0.0265134	14.6667	16	0.341216	0.0777027
云南省	大理白族自治州	0	34	16	1	2	7500	11	4	4	5	5	5	4	5	4	4	4	5	5	4	5	5	5	4	5	4	5	5	5	4	5	4.5	4.33333	4.75	4.5	4.8	1	1	1	1	1	1	1	0.420376	20.5833	21.375	0.507883	0.827703
江苏省	无锡市	1	29	19	0	1	10000	3.5	3	4	4	4	2	4	3	3	4	4	4	2	3	2	2	3	2	1	2	3	4	3	2	2	3.5	4	2.25	2	2.8	1	1	1	1	1	1	1	0.822966	9	4.5	-0.492117	-1.6723
广东省	江门市	1	23	16	1	1	8000	1.5	4	5	5	4	3	4	4	4	4	4	5	5	5	5	5	4	4	5	5	4	4	4	5	4	4.16667	4.33333	5	4.5	4.2	1	1	1	1	1	1	1	0.188112	21.6667	22.5	0.174549	1.0777
浙江省	杭州市	0	43	16	1	2	10000	19	5	5	4	4	4	5	5	5	4	4	4	4	5	4	4	4	4	4	4	4	5	4	4	4	4.5	4	4.25	4	4.2	1	1	1	1	1	1	1	0.166435	17	17	0.507883	0.327703
山东省	济宁市	0	26	16	0	1	6000	3	3	4	5	3	2	3	4	4	4	4	4	3	4	4	5	3	2	3	2	4	4	4	4	3	3.33333	4	4	2.5	3.8	1	1	1	1	1	1	1	-0.0511893	16	10	-0.658784	0.0777027
广西壮族自治区	崇左市	1	29	18	0	2	9500	7	4	5	4	5	4	5	5	4	5	4	5	4	5	4	5	4	5	4	5	4	5	5	4	5	4.5	4.66667	4.5	4.5	4.6	1	1	1	1	1	1	1	0.293405	21	20.25	0.507883	0.577703
四川省	成都市	1	57	16	1	2	16000	39	5	4	5	4	4	5	5	5	5	5	4	4	4	4	5	4	3	3	3	4	4	4	2	3	4.5	4.66667	4.25	3.25	3.4	1	1	1	1	1	1	1	0.166435	19.8333	13.8125	0.507883	0.327703
广东省	广州市	1	30	16	0	1	8000	7	5	4	5	4	3	5	5	4	5	4	4	3	4	4	4	4	4	4	5	4	4	3	4	3	4.33333	4.33333	3.75	4.25	3.6	1	1	1	1	1	1	1	-0.0587907	16.25	15.9375	0.341216	-0.172297
广西壮族自治区	桂林市	0	52	16	1	2	10000	20	4	4	4	5	4	5	5	4	4	5	4	5	4	5	4	5	4	5	5	4	5	4	5	4	4.33333	4.33333	4.5	4.75	4.4	1	1	1	1	1	1	1	0.197122	19.5	21.375	0.341216	0.577703
广东省	肇庆市	0	35	16	1	2	11000	2	4	5	4	4	3	5	4	4	4	4	4	4	4	4	4	4	4	4	4	4	4	4	4	4	4.16667	4	4	4	4	1	1	1	1	1	1	1	0.013563	16	16	0.174549	0.0777027
陕西省	西安市	1	38	16	1	2	8000	15	4	4	4	4	4	5	5	4	4	5	4	4	4	5	4	4	5	5	5	4	5	5	4	4	4.16667	4.33333	4.25	4.75	4.4	1	1	1	1	1	1	1	0.0572003	18.4167	20.1875	0.174549	0.327703
甘肃省	兰州市	1	26	16	0	1	6000	2	4	5	3	4	4	4	4	4	4	4	4	4	4	4	4	4	4	4	4	3	4	3	3	4	4	4	4	4	3.4	1	1	1	1	1	1	1	0.0006125	16	16	0.0078829	0.0777027
河南省	三门峡市	1	55	16	1	2	8000	30	4	4	5	4	4	5	4	5	4	5	4	4	5	4	5	4	5	4	4	4	5	4	4	5	4.33333	4.33333	4.5	4.25	4.4	1	1	1	1	1	1	1	0.197122	19.5	19.125	0.341216	0.577703
山东省	青岛市	1	41	16	0	1	7000	17	3	4	4	4	2	4	5	4	4	4	4	4	5	4	4	4	4	3	4	4	4	4	4	4	3.5	4	4.25	3.75	4	1	1	1	1	1	1	1	-0.161268	17	15.9375	-0.492117	0.327703
江苏省	苏州市	1	36	12	0	1	15000	12	4	5	4	4	2	4	5	5	5	4	4	4	4	3	4	4	4	4	5	3	4	4	3	4	3.83333	4.33333	3.75	4.25	3.6	1	1	1	1	1	1	1	0.027358	16.25	15.9375	-0.158784	-0.172297
浙江省	金华市	1	26	16	0	1	8000	2	3	4	2	4	4	5	5	4	4	4	5	4	5	2	3	4	4	3	3	2	4	4	5	3	3.66667	4.33333	3.5	3.5	3.6	1	1	1	1	1	1	1	0.137437	15.1667	12.25	-0.32545	-0.422297
江西省	九江市	1	32	16	1	2	5000	6	3	4	4	4	4	4	4	4	4	5	4	4	4	4	4	3	3	3	4	4	4	4	4	4	3.83333	4.33333	4	3.25	4	1	1	1	1	1	1	1	-0.0123379	17.3333	13	-0.158784	0.0777027
湖南省	郴州市	0	24	16	0	1	3500	1	4	5	3	4	2	4	4	3	5	5	4	2	4	4	4	3	2	3	3	4	4	4	3	4	3.66667	4.66667	3.5	2.75	3.8	1	1	1	1	1	1	1	0.137437	16.3333	9.625	-0.32545	-0.422297
河南省	商丘市	1	36	16	1	1	6000	9	4	4	4	4	4	4	5	4	5	4	4	4	4	5	4	4	4	4	4	5	4	5	4	4	4	4.33333	4.25	4	4.4	1	1	1	1	1	1	1	0.0025832	18.4167	17	0.0078829	0.327703
辽宁省	沈阳市	1	33	16	1	2	7600	8	4	4	4	4	4	5	5	4	5	4	4	3	5	4	4	4	5	4	5	5	3	5	4	4	4.16667	4.33333	4	4.5	4.2	1	1	1	1	1	1	1	0.013563	17.3333	18	0.174549	0.0777027
河南省	信阳市	0	29	17	1	1	5000	4	5	4	5	3	1	5	5	5	5	5	5	5	5	1	1	4	3	3	3	1	3	3	1	1	3.83333	5	3	3.25	1.8	1	1	1	1	1	1	1	0.146446	15	9.75	-0.158784	-0.922297
四川省	内江市	0	46	19	1	3	16000	23	5	5	5	4	3	4	5	5	5	5	5	4	4	5	4	4	5	4	4	5	5	5	4	5	4.33333	5	4.25	4.25	4.8	1	1	1	1	1	1	1	0.111818	21.25	18.0625	0.341216	0.327703
河北省	衡水市	0	31	16	1	2	6000	6	4	4	3	5	3	5	5	4	5	4	3	4	5	5	4	5	4	5	3	5	4	5	4	5	4	4	4.5	4.25	4.6	1	1	1	1	1	1	1	0.004554	18	19.125	0.0078829	0.577703
河南省	郑州市	1	34	15	1	2	8500	10	4	5	5	5	2	4	4	5	4	5	4	5	4	4	5	5	4	4	4	5	4	4	4	5	4.16667	4.33333	4.5	4.25	4.4	1	1	1	1	1	1	1	0.100838	19.5	19.125	0.174549	0.577703
保留	保留	1	30	16	1	2	9000	3	4	4	4	5	3	4	5	4	4	4	5	3	3	4	3	3	4	5	4	3	4	5	4	5	4	4.33333	3.25	4	4.2	1	1	1	1	1	1	1	-0.0052996	14.0833	13	0.0078829	-0.672297
湖南省	长沙市	0	34	19	1	2	7500	7	5	4	5	4	5	5	4	5	4	5	4	4	5	5	4	5	4	4	5	4	5	5	5	4	4.66667	4.33333	4.5	4.5	4.6	1	1	1	1	1	1	1	0.389689	19.5	20.25	0.674549	0.577703
湖南省	益阳市	1	24	16	1	2	6000	3	5	4	5	4	4	5	5	4	5	4	5	4	5	5	4	3	4	4	5	4	5	5	5	4	4.5	4.66667	4.5	4	4.6	1	1	1	1	1	1	1	0.293405	21	18	0.507883	0.577703
湖南省	长沙市	1	25	16	1	1	5000	2	3	5	4	3	2	2	4	3	5	4	3	3	4	4	3	4	4	3	3	4	4	4	3	4	3.16667	4	3.5	3.5	3.8	1	1	1	1	1	1	1	0.348585	14	12.25	-0.82545	-0.422297
贵州省	贵阳市	0	37	19	1	2	8500	10	4	4	4	4	4	5	5	5	4	4	4	4	5	4	4	4	4	4	4	5	4	4	4	4	4.16667	4	4.25	4	4.2	1	1	1	1	1	1	1	0.0572003	17	17	0.174549	0.327703
山西省	运城市	0	48	15	1	1	6000	25	3	4	4	4	4	5	5	4	4	4	4	3	4	4	4	4	3	3	3	4	4	4	4	4	4	4	3.75	3.25	4	1	1	1	1	1	1	1	-0.0013582	15	12.1875	0.0078829	-0.172297
广东省	广州市	0	28	28	0	2	8500	6	4	5	4	5	4	5	5	4	5	4	5	5	4	5	4	5	4	5	4	5	4	4	5	4	4.5	4.66667	4.5	4.5	4.4	1	1	1	1	1	1	1	0.293405	21	20.25	0.507883	0.577703
吉林省	松原市	1	25	16	0	1	10000	3	4	4	5	4	4	5	4	4	5	4	4	4	5	4	4	4	5	5	4	4	4	5	4	4	4.33333	4.33333	4.25	4.5	4.2	1	1	1	1	1	1	1	0.111818	18.4167	19.125	0.341216	0.327703
广东省	深圳市	1	36	18	1	2	9500	8	3	4	4	3	2	4	5	4	4	5	4	5	4	4	3	4	4	5	4	4	3	3	2	2	3.33333	4.33333	4	4.25	2.8	1	1	1	1	1	1	1	-0.0511893	17.3333	17	-0.658784	0.0777027
四川省	达州市	1	26	16	1	2	5200	4	5	4	4	4	4	4	4	5	5	4	4	4	5	4	3	4	3	4	4	4	4	4	4	3	4.16667	4.33333	4	3.75	3.8	1	1	1	1	1	1	1	0.013563	17.3333	15	0.174549	0.0777027
浙江省	杭州市	1	25	16	0	1	6000	1	3	5	5	4	3	4	5	4	4	5	5	4	5	4	4	4	4	4	4	5	5	5	5	5	4	4.66667	4.25	4	5	1	1	1	1	1	1	1	0.0025832	19.8333	17	0.0078829	0.327703
浙江省	杭州市	1	33	16	1	1	8500	9	4	4	3	3	2	3	4	3	4	3	3	3	3	4	4	2	2	2	2	4	4	3	3	3	3.16667	3.33333	3.5	2	3.4	1	1	1	1	1	1	1	0.348585	11.6667	7	-0.82545	-0.422297
浙江省	杭州市	1	32	16	1	2	12500	10	4	3	5	4	4	5	3	4	5	5	5	4	4	3	3	4	4	4	4	3	3	4	3	3	4.16667	5	3.5	4	3.2	1	1	1	1	1	1	1	-0.0737117	17.5	14	0.174549	-0.422297
江苏省	无锡市	1	25	17	1	1	10000	1	4	4	5	4	4	4	4	5	4	5	5	4	4	4	4	5	5	4	4	5	5	4	5	4	4.16667	4.66667	4	4.5	4.6	1	1	1	1	1	1	1	0.013563	18.6667	18	0.174549	0.0777027
江西省	抚州市	0	28	19	1	2	6500	2	3	4	5	3	2	4	4	4	5	5	4	3	4	4	3	4	3	3	4	4	4	3	3	4	3.5	4.66667	3.5	3.5	3.6	1	1	1	1	1	1	1	0.20782	16.3333	12.25	-0.492117	-0.422297
安徽省	合肥市	1	36	16	1	2	5600	13	3	4	4	4	3	3	3	3	4	4	4	4	4	2	2	4	4	4	4	4	3	4	4	3	3.5	4	3	4	3.6	1	1	1	1	1	1	1	0.453878	12	12	-0.492117	-0.922297
河南省	郑州市	1	24	16	0	1	6000	2	4	5	4	4	2	4	5	5	5	4	4	4	4	4	3	5	4	4	4	4	4	4	4	3	3.83333	4.33333	3.75	4.25	3.8	1	1	1	1	1	1	1	0.027358	16.25	15.9375	-0.158784	-0.172297
浙江省	丽水市	0	30	16	1	1	12000	7	3	4	3	3	2	4	4	2	4	4	3	3	2	4	4	4	3	3	3	4	4	3	4	3	3.16667	3.66667	3.25	3.25	3.6	1	1	1	1	1	1	1	0.554948	11.9167	10.5625	-0.82545	-0.672297
云南省	红河哈尼族彝族自治州	1	55	16	1	2	10000	35	4	5	4	4	2	5	4	4	4	4	4	3	4	4	4	4	4	4	3	4	3	4	4	3	4	4	3.75	3.75	3.6	1	1	1	1	1	1	1	-0.0013582	15	14.0625	0.0078829	-0.172297
广东省	梅州市	1	24	16	1	1	6500	2	5	5	5	4	3	4	4	4	4	5	4	5	4	4	5	4	5	5	4	4	5	4	4	4	4.33333	4.33333	4.5	4.5	4.2	1	1	1	1	1	1	1	0.197122	19.5	20.25	0.341216	0.577703
山西省	大同市	1	32	16	1	2	10000	5	4	4	5	4	4	4	5	4	5	5	4	4	5	4	4	4	5	4	4	4	5	5	4	5	4.16667	4.66667	4.25	4.25	4.6	1	1	1	1	1	1	1	0.0572003	19.8333	18.0625	0.174549	0.327703
北京市	市辖区	1	44	16	1	2	17000	20	4	5	3	5	3	4	5	4	5	4	5	4	5	4	5	4	5	4	5	4	5	4	5	4	4	4.66667	4.5	4.5	4.4	1	1	1	1	1	1	1	0.004554	21	20.25	0.0078829	0.577703
河南省	新乡市	0	38	16	1	2	7500	13	3	5	5	4	3	4	5	4	4	4	3	3	4	4	4	4	4	4	4	4	4	4	4	5	4	3.66667	3.75	4	4.2	1	1	1	1	1	1	1	-0.0013582	13.75	15	0.0078829	-0.172297
广西壮族自治区	南宁市	0	28	16	1	2	8600	5	4	5	5	4	5	4	4	4	5	4	5	4	4	5	4	4	5	4	5	5	4	5	4	5	4.5	4.66667	4.25	4.5	4.6	1	1	1	1	1	1	1	0.166435	19.8333	19.125	0.507883	0.327703
江苏省	苏州市	1	30	16	1	2	7500	6	4	5	4	5	5	5	5	5	4	5	4	5	5	4	4	5	4	5	5	4	4	4	4	5	4.66667	4.33333	4.5	4.75	4.2	1	1	1	1	1	1	1	0.389689	19.5	21.375	0.674549	0.577703
黑龙江省	哈尔滨市	1	34	16	1	1	4500	9	5	4	4	5	4	4	5	4	5	4	4	3	4	3	5	2	3	3	2	4	3	4	4	4	4.33333	4.33333	3.75	2.5	3.8	1	1	1	1	1	1	1	-0.0587907	16.25	9.375	0.341216	-0.172297
江苏省	南通市	1	41	16	1	2	8800	13	3	4	4	4	4	5	5	3	4	4	3	4	5	3	4	4	5	4	3	4	5	3	4	3	4	3.66667	4	4	3.8	1	1	1	1	1	1	1	0.0006125	14.6667	16	0.0078829	0.0777027
江苏省	南京市	1	29	16	0	1	7000	5	3	5	3	4	3	5	5	5	5	5	5	5	5	5	5	4	4	4	5	5	5	4	4	3	3.83333	5	5	4.25	4.2	1	1	1	1	1	1	1	-0.171122	25	21.25	-0.158784	1.0777
江苏省	徐州市	0	32	16	1	2	8000	9	3	4	4	2	2	3	4	4	4	4	4	4	4	4	4	3	4	3	3	4	4	3	4	4	3	4	4	3.25	3.8	1	1	1	1	1	1	1	-0.0770902	16	13	-0.992117	0.0777027
湖北省	恩施土家族苗族自治州	1	41	16	1	1	6700	16	4	4	4	4	4	5	4	5	4	4	5	4	5	4	4	5	4	4	4	4	4	4	4	5	4.16667	4.33333	4.25	4.25	4.2	1	1	1	1	1	1	1	0.0572003	18.4167	18.0625	0.174549	0.327703
北京市	市辖区	1	29	19	1	1	6000	3	3	5	3	2	2	4	3	2	3	2	1	3	3	4	4	4	2	3	2	4	2	3	4	3	3.16667	2	3.5	2.75	3.2	1	1	1	1	1	1	1	0.348585	7	9.625	-0.82545	-0.422297
陕西省	延安市	1	28	13	1	2	10000	6	5	4	4	4	4	4	5	4	5	4	4	5	5	4	4	5	4	4	4	4	5	4	4	5	4.16667	4.33333	4.5	4.25	4.4	1	1	1	1	1	1	1	0.100838	19.5	19.125	0.174549	0.577703
重庆市	市辖区	0	31	16	1	1	6000	6	5	4	5	4	3	4	5	3	5	4	5	4	5	3	2	3	5	4	5	5	4	4	4	3	4.16667	4.66667	3.5	4.25	4	1	1	1	1	1	1	1	-0.0737117	16.3333	14.875	0.174549	-0.422297
河南省	漯河市	1	31	16	0	1	4500	5	4	5	5	4	4	5	4	5	4	4	5	4	5	4	5	4	5	4	5	5	4	5	4	5	4.5	4.33333	4.5	4.5	4.6	1	1	1	1	1	1	1	0.293405	19.5	20.25	0.507883	0.577703
山东省	青岛市	0	29	16	0	2	7000	3	4	4	5	5	2	4	4	4	5	4	5	4	5	3	3	4	4	4	4	5	5	4	4	3	4	4.66667	3.75	4	4.2	1	1	1	1	1	1	1	-0.0013582	17.5	15	0.0078829	-0.172297
北京市	市辖区	1	36	18	1	2	18000	10	4	4	4	3	3	4	5	4	5	4	5	4	4	5	4	4	5	4	5	4	4	4	4	5	3.66667	4.66667	4.25	4.5	4.2	1	1	1	1	1	1	1	-0.106651	19.8333	19.125	-0.32545	0.327703
福建省	福州市	0	25	16	1	1	6000	3	4	4	4	4	2	4	4	4	5	5	5	5	4	4	4	3	3	3	3	4	4	3	3	3	3.66667	5	4.25	3	3.4	1	1	1	1	1	1	1	-0.106651	21.25	12.75	-0.32545	0.327703
河北省	邢台市	1	50	16	1	2	4200	29	4	4	5	4	4	4	5	4	5	4	4	4	4	5	4	4	4	5	4	4	4	5	4	5	4.16667	4.33333	4.25	4.25	4.4	1	1	1	1	1	1	1	0.0572003	18.4167	18.0625	0.174549	0.327703
四川省	成都市	0	31	19	1	2	7500	6	4	4	4	5	3	4	4	4	5	5	5	4	4	3	3	4	4	3	3	3	4	3	4	4	4	5	3.5	3.5	3.6	1	1	1	1	1	1	1	-0.0033289	17.5	12.25	0.0078829	-0.422297
黑龙江省	绥化市	0	38	18	1	2	6000	10	4	5	5	4	4	5	5	5	5	5	5	5	5	4	4	4	4	5	5	5	4	5	5	5	4.5	5	4.5	4.5	4.8	1	1	1	1	1	1	1	0.293405	22.5	20.25	0.507883	0.577703
山东省	菏泽市	0	34	16	1	2	7200	9	3	4	3	4	5	5	4	4	4	4	3	3	4	4	3	4	3	3	3	4	4	3	4	4	4	3.66667	3.5	3.25	3.8	1	1	1	1	1	1	1	-0.0033289	12.8333	11.375	0.0078829	-0.422297
江西省	赣州市	0	30	16	1	1	8500	6	5	4	4	5	3	4	4	5	4	5	4	4	5	4	4	4	5	4	4	5	4	5	4	4	4.16667	4.33333	4.25	4.25	4.4	1	1	1	1	1	1	1	0.0572003	18.4167	18.0625	0.174549	0.327703
云南省	昆明市	0	25	16	1	2	5000	1	4	5	4	4	3	4	4	5	4	4	4	4	3	5	5	4	3	3	3	4	4	4	4	4	4	4	4.25	3.25	4	1	1	1	1	1	1	1	0.0025832	17	13.8125	0.0078829	0.327703
安徽省	宣城市	0	25	16	1	1	4000	2	3	4	4	4	3	4	4	3	4	4	4	4	4	3	3	4	3	3	3	3	4	4	4	4	3.66667	4	3.5	3.25	3.8	1	1	1	1	1	1	1	0.137437	14	11.375	-0.32545	-0.422297
广东省	清远市	0	26	16	0	1	8400	2	3	5	2	3	1	3	3	1	4	4	3	2	3	1	2	3	2	2	3	4	5	3	4	3	2.83333	3.66667	2	2.5	3.8	1	1	1	1	1	1	1	2.22753	7.33333	5	-1.15878	-1.9223
河北省	承德市	1	40	16	1	2	8000	17	3	4	4	4	4	5	5	4	5	5	4	4	3	4	5	4	5	4	4	5	4	5	4	5	4	4.66667	4	4.25	4.6	1	1	1	1	1	1	1	0.0006125	18.6667	17	0.0078829	0.0777027
黑龙江省	哈尔滨市	1	42	16	1	2	8500	18	4	5	4	4	4	5	4	5	5	5	4	5	4	3	4	4	3	4	4	5	4	5	4	4	4.33333	4.66667	4	3.75	4.4	1	1	1	1	1	1	1	0.0265134	18.6667	15	0.341216	0.0777027
北京市	市辖区	0	27	18	1	2	12000	2	5	5	5	5	5	5	5	4	5	5	5	4	4	4	4	4	4	3	4	4	4	4	3	3	5	5	4	3.75	3.6	1	1	1	1	1	1	1	0.0783152	20	15	1.00788	0.0777027
河北省	邢台市	1	59	16	1	2	8000	40	4	5	5	4	4	5	5	4	5	5	4	4	4	3	3	4	3	4	5	4	4	5	4	4	4.5	4.66667	3.5	4	4.2	1	1	1	1	1	1	1	-0.214478	16.3333	14	0.507883	-0.422297
广东省	深圳市	0	58	16	0	2	12800	36	4	4	5	4	4	5	4	4	4	5	5	4	5	4	5	5	4	4	5	4	4	5	5	4	4.33333	4.66667	4.5	4.5	4.4	1	1	1	1	1	1	1	0.197122	21	20.25	0.341216	0.577703
上海市	市辖区	1	28	16	0	1	5000	4	3	4	2	2	3	2	4	4	5	4	4	2	3	2	2	3	3	3	3	4	4	3	2	3	2.66667	4.33333	2.25	3	3.2	1	1	1	1	1	1	1	2.21655	9.75	6.75	-1.32545	-1.6723
上海市	市辖区	0	32	16	0	2	8300	10	4	4	5	5	5	5	5	4	5	4	5	5	4	4	5	5	5	4	5	4	4	5	4	5	4.66667	4.66667	4.5	4.75	4.4	1	1	1	1	1	1	1	0.389689	21	21.375	0.674549	0.577703
湖北省	随州市	0	34	15	0	1	5000	9	4	4	4	4	3	4	5	5	4	5	4	3	4	5	5	3	3	4	3	4	5	4	4	5	3.83333	4.33333	4.25	3.25	4.4	1	1	1	1	1	1	1	-0.0520339	18.4167	13.8125	-0.158784	0.327703
湖南省	长沙市	0	25	19	1	2	6000	1	3	4	4	4	3	4	4	3	4	4	4	4	4	2	2	4	2	3	2	4	4	4	4	4	3.66667	4	3	2.75	4	1	1	1	1	1	1	1	0.300162	12	8.25	-0.32545	-0.922297
山西省	吕梁市	0	26	19	0	1	5000	2	5	4	4	5	5	4	4	4	4	5	4	4	4	4	5	4	4	4	4	4	4	4	4	4	4.5	4.33333	4.25	4	4	1	1	1	1	1	1	1	0.166435	18.4167	17	0.507883	0.327703
天津市	市辖区	0	30	16	0	2	6300	6	3	4	3	2	2	3	3	2	4	4	3	4	2	2	3	2	2	2	2	3	2	2	3	4	2.83333	3.66667	2.75	2	2.8	1	1	1	1	1	1	1	1.35844	10.0833	5.5	-1.15878	-1.1723
江苏省	苏州市	0	27	19	1	2	8000	3	3	4	3	3	2	3	4	4	4	4	4	3	3	3	3	3	3	4	3	2	3	3	3	3	3	4	3	3.25	2.8	1	1	1	1	1	1	1	0.915027	12	9.75	-0.992117	-0.922297
山东省	菏泽市	0	24	16	0	1	5000	1	4	4	3	4	3	4	4	5	5	4	4	3	5	4	4	4	4	3	4	5	4	4	4	5	3.66667	4.33333	4	3.75	4.4	1	1	1	1	1	1	1	-0.0252884	17.3333	15	-0.32545	0.0777027
山东省	淄博市	0	27	19	1	2	5000	2	3	4	4	3	2	4	4	3	3	4	4	4	3	4	4	3	4	4	3	4	4	4	3	4	3.33333	3.66667	3.75	3.5	3.8	1	1	1	1	1	1	1	0.113507	13.75	13.125	-0.658784	-0.172297
河北省	张家口市	0	26	16	0	1	4000	4	3	4	2	4	2	2	4	4	5	5	5	4	5	5	4	4	2	2	2	4	4	4	4	4	2.83333	5	4.5	2.5	4	1	1	1	1	1	1	1	-0.669432	22.5	11.25	-1.15878	0.577703
河南省	三门峡市	0	31	15	0	1	6000	8	4	4	4	4	2	4	4	4	4	4	4	3	3	4	4	2	3	3	3	4	4	4	4	4	3.66667	4	3.5	2.75	4	1	1	1	1	1	1	1	0.137437	14	9.625	-0.32545	-0.422297
吉林省	长春市	0	50	16	1	2	6500	26	4	5	4	4	3	4	5	5	5	5	5	4	4	5	5	4	4	4	5	5	4	5	4	5	4	5	4.5	4.25	4.6	1	1	1	1	1	1	1	0.004554	22.5	19.125	0.0078829	0.577703
江西省	上饶市	0	35	16	1	2	5000	5	3	4	4	4	4	5	4	5	5	4	4	4	5	4	4	4	4	4	5	4	4	4	4	5	4	4.33333	4.25	4.25	4.2	1	1	1	1	1	1	1	0.0025832	18.4167	18.0625	0.0078829	0.327703
河南省	周口市	1	31	16	1	1	6700	6	5	4	5	4	4	5	4	5	4	4	5	4	5	4	5	4	4	5	4	5	4	5	4	5	4.5	4.33333	4.5	4.25	4.6	1	1	1	1	1	1	1	0.293405	19.5	19.125	0.507883	0.577703
北京市	市辖区	0	39	16	1	2	11000	13	5	4	4	5	4	5	5	4	5	4	4	5	4	4	5	4	4	5	5	4	5	5	4	5	4.5	4.33333	4.5	4.5	4.6	1	1	1	1	1	1	1	0.293405	19.5	20.25	0.507883	0.577703
河北省	石家庄市	0	36	16	0	1	7300	11	5	4	4	4	4	5	5	5	4	5	5	4	5	5	4	4	5	5	4	4	5	5	4	5	4.33333	4.66667	4.5	4.5	4.6	1	1	1	1	1	1	1	0.197122	21	20.25	0.341216	0.577703
广西壮族自治区	玉林市	0	35	16	1	2	5000	11	4	4	5	5	4	4	4	4	4	4	4	3	4	3	4	4	3	4	3	3	4	4	4	4	4.33333	4	3.5	3.5	3.8	1	1	1	1	1	1	1	-0.144095	14	12.25	0.341216	-0.422297
山西省	朔州市	1	36	18	0	2	6000	10	5	4	4	4	4	5	5	5	4	4	5	5	5	5	4	5	4	5	5	4	4	5	4	5	4.33333	4.33333	4.75	4.75	4.4	1	1	1	1	1	1	1	0.282426	20.5833	22.5625	0.341216	0.827703
重庆市	市辖区	0	30	16	1	1	4200	6	4	4	4	4	3	4	5	4	4	4	4	3	4	4	5	3	3	3	2	3	4	3	4	4	3.83333	4	4	2.75	3.6	1	1	1	1	1	1	1	-0.0123379	16	11	-0.158784	0.0777027
广东省	深圳市	0	37	16	0	2	10200	16	4	5	5	4	4	5	5	4	4	5	5	5	4	4	5	4	5	4	4	5	4	4	4	5	4.5	4.66667	4.5	4.25	4.4	1	1	1	1	1	1	1	0.293405	21	19.125	0.507883	0.577703
广西壮族自治区	玉林市	1	27	16	0	1	5000	4	4	5	5	4	5	4	4	4	4	5	5	5	4	5	4	4	5	4	5	4	5	3	4	5	4.5	4.66667	4.5	4.5	4.2	1	1	1	1	1	1	1	0.293405	21	20.25	0.507883	0.577703
山东省	潍坊市	0	54	16	0	2	8600	34	3	4	3	4	4	4	4	4	5	5	4	4	4	4	5	4	4	4	4	4	3	4	4	4	3.66667	4.66667	4.25	4	3.8	1	1	1	1	1	1	1	-0.106651	19.8333	17	-0.32545	0.327703
陕西省	渭南市	1	32	18	1	2	8000	7	5	4	4	4	4	5	4	4	4	4	5	4	5	5	4	4	4	5	4	4	5	4	5	5	4.33333	4.33333	4.5	4.25	4.6	1	1	1	1	1	1	1	0.197122	19.5	19.125	0.341216	0.577703
河南省	郑州市	0	32	19	1	2	16000	7	5	4	5	4	4	5	4	5	5	4	4	4	5	4	5	4	5	4	5	4	5	5	5	4	4.5	4.33333	4.5	4.5	4.6	1	1	1	1	1	1	1	0.293405	19.5	20.25	0.507883	0.577703
河北省	邢台市	0	47	16	0	1	6000	25	5	5	5	2	2	5	5	4	4	4	4	4	2	2	2	2	4	4	3	5	4	4	4	4	4	4	2.5	3.25	4.2	1	1	1	1	1	1	1	-0.0112118	10	8.125	0.0078829	-1.4223
广东省	深圳市	0	33	16	0	2	9200	12	4	5	5	4	4	4	5	4	4	4	5	5	4	4	5	4	5	4	5	4	4	5	4	5	4.33333	4.33333	4.5	4.5	4.4	1	1	1	1	1	1	1	0.197122	19.5	20.25	0.341216	0.577703
黑龙江省	哈尔滨市	1	28	16	1	2	5200	4	4	5	4	4	5	4	5	4	4	4	4	4	4	4	4	4	5	4	4	4	4	5	5	5	4.33333	4	4	4.25	4.6	1	1	1	1	1	1	1	0.0265134	16	17	0.341216	0.0777027
Ontario	Willowdale	0	32	16	0	2	10000	8	2	3	4	4	3	2	5	5	5	5	4	5	5	5	5	4	4	4	5	5	4	4	4	5	3	4.66667	5	4.25	4.4	1	1	1	1	1	1	1	-1.06921	23.3333	21.25	-0.992117	1.0777
河南省	安阳市	0	32	12	0	2	6000	7	5	4	5	4	3	4	5	4	5	4	4	4	4	4	4	2	3	3	3	4	4	4	4	4	4.16667	4.33333	4	2.75	4	1	1	1	1	1	1	1	0.013563	17.3333	11	0.174549	0.0777027
北京市	市辖区	0	23	16	0	1	8000	1	3	4	4	3	2	4	5	4	4	4	4	4	4	3	2	2	3	1	2	4	3	3	2	3	3.33333	4	3.25	2	3	1	1	1	1	1	1	1	0.442899	13	6.5	-0.658784	-0.672297
湖南省	长沙市	1	25	18	1	2	5500	2	2	4	3	2	2	4	5	4	5	4	4	3	4	2	2	4	4	4	5	3	4	4	2	3	2.83333	4.33333	2.75	4.25	3.2	1	1	1	1	1	1	1	1.35844	11.9167	11.6875	-1.15878	-1.1723
安徽省	合肥市	1	33	16	1	2	9000	10	4	4	4	4	4	5	5	4	5	5	4	4	5	4	4	4	4	4	4	4	4	4	4	3	4.16667	4.66667	4.25	4	3.8	1	1	1	1	1	1	1	0.0572003	19.8333	17	0.174549	0.327703
北京市	市辖区	0	33	16	1	2	15000	5	3	4	4	3	2	2	4	5	5	5	4	4	4	5	4	3	3	3	2	4	4	3	4	2	3	4.66667	4.25	2.75	3.4	1	1	1	1	1	1	1	-0.32512	19.8333	11.6875	-0.992117	0.327703
天津市	市辖区	1	35	16	1	2	8000	11	3	3	5	3	2	4	5	4	5	4	4	4	4	3	4	3	3	4	3	3	4	3	3	3	3.33333	4.33333	3.75	3.25	3.2	1	1	1	1	1	1	1	0.113507	16.25	12.1875	-0.658784	-0.172297
山东省	日照市	1	30	19	1	2	7000	3	4	5	3	5	4	5	4	5	5	4	5	4	4	3	3	4	3	3	4	4	4	4	4	5	4.33333	4.66667	3.5	3.5	4.2	1	1	1	1	1	1	1	-0.144095	16.3333	12.25	0.341216	-0.422297
内蒙古自治区	锡林郭勒盟	0	31	16	0	1	7000	7	4	5	4	5	3	4	5	4	5	4	4	4	2	4	4	3	4	4	4	4	4	4	4	4	4.16667	4.33333	3.5	3.75	4	1	1	1	1	1	1	1	-0.0737117	15.1667	13.125	0.174549	-0.422297
河南省	平顶山市	0	40	16	1	2	8000	18	4	5	4	4	5	4	5	4	5	4	5	3	3	4	4	2	3	3	3	4	5	5	3	4	4.33333	4.66667	3.5	2.75	4.2	1	1	1	1	1	1	1	-0.144095	16.3333	9.625	0.341216	-0.422297
山西省	吕梁市	0	26	19	0	1	3000	1	4	5	4	4	3	4	5	4	4	4	4	3	4	4	5	4	4	4	5	4	5	4	4	3	4	4	4	4.25	4	1	1	1	1	1	1	1	0.0006125	16	17	0.0078829	0.0777027
福建省	泉州市	0	30	16	1	2	5000	7	5	4	4	5	5	4	4	5	5	4	4	4	5	5	4	4	5	4	4	5	4	4	5	5	4.5	4.33333	4.5	4.25	4.6	1	1	1	1	1	1	1	0.293405	19.5	19.125	0.507883	0.577703
陕西省	延安市	0	40	16	1	2	9000	13	4	4	4	4	4	4	4	4	4	4	4	5	4	5	4	5	5	4	4	4	4	5	4	4	4	4	4.5	4.5	4.2	1	1	1	1	1	1	1	0.004554	18	20.25	0.0078829	0.577703
河北省	石家庄市	1	29	19	1	2	7000	6	4	4	4	3	2	5	4	3	4	5	4	3	4	2	3	3	2	4	3	3	3	4	2	3	3.66667	4.33333	3	3	3	1	1	1	1	1	1	1	0.300162	13	9	-0.32545	-0.922297
江苏省	无锡市	0	31	16	1	1	3500	5	3	3	4	3	3	4	4	4	4	4	4	3	3	3	3	4	3	3	3	3	4	3	4	4	3.33333	4	3	3.25	3.6	1	1	1	1	1	1	1	0.607595	12	9.75	-0.658784	-0.922297
河南省	商丘市	0	57	16	1	1	8000	25	4	5	5	3	5	2	5	4	4	5	4	4	4	5	4	4	5	4	4	5	4	5	4	5	4	4.33333	4.25	4.25	4.6	1	1	1	1	1	1	1	0.0025832	18.4167	18.0625	0.0078829	0.327703
福建省	宁德市	0	36	16	1	2	12000	12	3	4	5	3	5	3	4	5	4	5	5	4	4	5	4	4	5	4	5	3	4	4	5	5	3.83333	4.66667	4.25	4.5	4.2	1	1	1	1	1	1	1	-0.0520339	19.8333	19.125	-0.158784	0.327703
江苏省	南通市	0	52	16	0	1	10000	25	4	5	4	5	4	5	5	4	4	4	4	4	5	4	4	4	4	5	4	5	5	5	4	4	4.5	4	4.25	4.25	4.6	1	1	1	1	1	1	1	0.166435	17	18.0625	0.507883	0.327703
山东省	泰安市	1	32	17	1	1	6000	9	4	5	4	4	4	5	4	4	4	4	4	4	4	4	4	4	4	4	4	3	3	4	2	3	4.33333	4	4	4	3	1	1	1	1	1	1	1	0.0265134	16	16	0.341216	0.0777027
广西壮族自治区	南宁市	1	26	16	1	2	6000	3	5	5	4	5	4	4	5	5	4	4	4	4	5	4	4	4	5	4	4	4	5	5	4	5	4.5	4	4.25	4.25	4.6	1	1	1	1	1	1	1	0.166435	17	18.0625	0.507883	0.327703
内蒙古自治区	赤峰市	0	31	15	1	2	4000	6	5	4	5	4	3	3	4	4	5	4	4	4	4	4	4	5	5	4	4	4	4	5	4	4	4	4.33333	4	4.5	4.2	1	1	1	1	1	1	1	0.0006125	17.3333	18	0.0078829	0.0777027
广东省	湛江市	0	34	19	1	2	9500	7	4	4	4	5	3	4	5	4	4	5	5	4	5	4	4	4	5	4	4	5	4	4	4	5	4	4.66667	4.25	4.25	4.4	1	1	1	1	1	1	1	0.0025832	19.8333	18.0625	0.0078829	0.327703
天津市	市辖区	1	25	19	0	1	5000	2	3	5	4	4	2	5	5	4	5	4	5	3	4	5	4	4	3	3	4	4	5	4	5	4	3.83333	4.66667	4	3.5	4.4	1	1	1	1	1	1	1	-0.0123379	18.6667	14	-0.158784	0.0777027
四川省	成都市	0	37	18	1	2	5000	13	3	3	4	4	3	4	3	3	4	4	4	4	4	3	4	4	3	4	4	4	4	3	3	3	3.5	4	3.75	3.75	3.4	1	1	1	1	1	1	1	0.0847904	15	14.0625	-0.492117	-0.172297
保留	保留	1	27	16	1	2	8500	6	4	4	4	4	4	5	5	4	4	5	4	4	5	4	5	4	5	4	5	4	5	5	4	4	4.16667	4.33333	4.5	4.5	4.4	1	1	1	1	1	1	1	0.100838	19.5	20.25	0.174549	0.577703
广西壮族自治区	贵港市	0	28	16	0	1	3000	4	4	5	4	4	3	5	4	4	4	4	3	4	4	5	4	3	4	3	3	4	4	4	4	4	4.16667	3.66667	4.25	3.25	4	1	1	1	1	1	1	1	0.0572003	15.5833	13.8125	0.174549	0.327703
山东省	青岛市	0	27	12	1	2	10000	5	5	4	4	5	4	4	5	4	5	5	4	4	5	5	5	4	5	5	5	4	5	4	4	5	4.33333	4.66667	4.75	4.75	4.4	1	1	1	1	1	1	1	0.282426	22.1667	22.5625	0.341216	0.827703
山东省	日照市	1	27	12	0	1	6000	4.5	4	4	4	4	4	4	3	3	4	3	3	3	2	3	3	4	4	4	4	4	4	4	4	2	4	3.33333	2.75	4	3.6	1	1	1	1	1	1	1	-0.0092411	9.16667	11	0.0078829	-1.1723
河北省	唐山市	1	38	14	1	2	20000	10	4	5	4	4	3	4	3	3	4	3	3	2	3	2	2	4	3	5	5	4	4	4	4	4	4	3.33333	2.25	4.25	4	1	1	1	1	1	1	1	-0.0131825	7.5	9.5625	0.0078829	-1.6723
黑龙江省	佳木斯市	0	42	16	1	2	15000	17	4	5	5	4	4	5	5	4	4	4	5	4	5	4	5	4	4	4	5	4	4	4	4	5	4.5	4.33333	4.5	4.25	4.2	1	1	1	1	1	1	1	0.293405	19.5	19.125	0.507883	0.577703
山东省	东营市	0	48	16	0	2	8500	26	4	5	4	4	4	4	4	4	4	4	4	3	3	4	4	4	3	4	3	4	4	4	4	4	4.16667	4	3.5	3.5	4	1	1	1	1	1	1	1	-0.0737117	14	12.25	0.174549	-0.422297
山东省	日照市	1	30	16	1	2	7000	6	2	4	4	4	5	4	4	3	4	5	4	3	2	4	4	4	3	4	4	5	4	3	4	4	3.83333	4.33333	3.25	3.75	4	1	1	1	1	1	1	1	0.10675	14.0833	12.1875	-0.158784	-0.672297
湖南省	衡阳市	0	27	19	1	2	5500	3	4	5	5	4	3	4	5	4	4	5	4	4	5	4	3	4	5	4	5	5	4	4	5	4	4.16667	4.33333	4	4.5	4.4	1	1	1	1	1	1	1	0.013563	17.3333	18	0.174549	0.0777027
河北省	邯郸市	1	51	15	1	1	6500	26	4	5	4	4	4	4	5	5	4	4	5	5	5	4	3	4	3	2	1	4	4	3	4	4	4.16667	4.33333	4.25	2.5	3.8	1	1	1	1	1	1	1	0.0572003	18.4167	10.625	0.174549	0.327703
天津市	市辖区	0	58	12	0	2	6200	22	4	3	3	2	2	4	4	4	4	4	4	3	4	4	4	3	4	3	3	3	4	4	3	4	3	4	3.75	3.25	3.6	1	1	1	1	1	1	1	0.170939	15	12.1875	-0.992117	-0.172297
河北省	廊坊市	1	28	16	0	1	8500	2	3	3	5	4	3	5	5	5	5	5	5	4	4	3	3	4	3	3	4	4	4	4	3	4	3.83333	5	3.5	3.5	3.8	1	1	1	1	1	1	1	0.067054	17.5	12.25	-0.158784	-0.422297
天津市	市辖区	1	30	16	0	1	9400	1	5	4	4	3	3	4	4	4	4	4	4	4	5	4	4	4	4	4	4	4	4	5	4	5	3.83333	4	4.25	4	4.4	1	1	1	1	1	1	1	-0.0520339	17	17	-0.158784	0.327703
广东省	东莞市	0	35	13	1	2	5600	12	4	5	4	5	4	5	4	5	4	5	4	4	5	4	5	4	5	4	5	3	4	4	5	4	4.5	4.33333	4.5	4.5	4	1	1	1	1	1	1	1	0.293405	19.5	20.25	0.507883	0.577703
山西省	晋城市	1	24	16	1	1	5000	2	2	3	4	3	1	4	4	3	4	4	3	2	4	2	4	4	4	4	3	2	2	3	2	2	2.83333	3.66667	3	3.75	2.2	1	1	1	1	1	1	1	1.06874	11	11.25	-1.15878	-0.922297
重庆市	市辖区	0	25	16	1	2	7000	3	5	5	4	3	2	5	2	1	5	4	4	3	2	4	4	2	3	4	3	4	5	4	4	4	4	4.33333	3.25	3	4.2	1	1	1	1	1	1	1	-0.0052996	14.0833	9.75	0.0078829	-0.672297
甘肃省	庆阳市	0	24	16	0	1	4500	2	4	5	3	4	3	4	5	5	4	4	4	5	4	4	4	4	4	4	4	4	4	4	4	4	3.83333	4	4.25	4	4	1	1	1	1	1	1	1	-0.0520339	17	17	-0.158784	0.327703
浙江省	衢州市	0	26	16	0	1	6000	2	5	5	4	3	1	4	4	3	5	4	3	3	4	4	4	2	2	3	2	3	3	3	2	2	3.66667	4	3.75	2.25	2.6	1	1	1	1	1	1	1	0.0560742	15	8.4375	-0.32545	-0.172297
[truncated: 5 more columns]
